# Supplementary material
Source: PubMed Central journal article supplement (PMC2701051)
Supplement: 0904172106_0904172106SI.pdf [file 0904172106_0904172106SI.pdf]

# Supporting Information

Wilson et al. 10.1073/pnas.0904172106

## SI Materials and Methods

**Generation of Mice Harboring an *Itpk1* Gene Trap Allele.** The ES cell line used to produce the transgenic mice was generated with the trapping construct pGT0pfs, containing the intron from the engrailed 2 gene upstream of the gene encoding the  $\beta$ gal/neomycin-resistance fusion protein. C57BL6 mice were obtained from The Jackson Laboratory. PCR-based genotyping of mice was carried out using standard techniques. The primers were 5'-ATTGCACGCAGGTTCTCCGG-3' and 5'-GGGTCACGACGAGATCCTCG-3'. PCR conditions were 30 cycles at 95 °C for 1 min, 58 °C for 1 min, and 72 °C for 2 min. DNA was prepared from 0.2 cm of clipped tail from 15-day-old mice and purified using the Wizard Genomic DNA Purification Kit (Promega) in accordance with the manufacturer's protocol, using 1  $\mu$ L of final DNA solution per 50  $\mu$ L of PCR. Reaction products were electrophoresed on 1% agarose gel and stained with ethidium bromide. To distinguish heterozygotes from homozygotes, PCR was performed using a single sense oligonucleotide 5'-GAGCTGTCTCTCCGTCCTTGTGATTT-3' and 2 anti-sense oligonucleotides, 261 bp into the gene trap vector, 5'-CGCCATACAGTCCTTTCACATCCAT-3', and 3' to the gene trap integration site, 5'-AGTACAGCAATGAACAGCCTATCTCTG-3'.

**Embryo Collection.** Mice were euthanized by carbon dioxide inhalation, and whole embryos or isolated tissue were either frozen immediately in Tissue Tec cryopreservation solution (Sakura Finetek) or fixed overnight in 4% paraformaldehyde in PBS (pH 7.2), and then embedded in paraffin. Then 10- $\mu$ m cryostat sections were prepared from E15 to P1 for in situ hybridization and immunohistochemistry, and 5- $\mu$ m sections from the paraffin-embedded embryos were used for immunohistochemistry. For each embryonic stage, sections from at least 2 embryos were analyzed.

**Preparation of ITPK1 Antibody and Western Blot Analysis.** A recombinant fusion protein between GST and residues 124–311 of human ITPK1 was prepared in *Escherichia coli*, purified by chromatography on a glutathione agarose column, and used to immunize rabbits (Pocono Rabbit Farm and Laboratory). Lysis buffer for brain homogenates contained 20 mM Hepes (pH 7.6), 140 mM NaCl, 10% glycerol, 1 mM DTT, 1 mM EGTA, 1 mM MgCl<sub>2</sub>, 10 mM benzamidine, 40  $\mu$ M iodoacetamide, 1  $\mu$ M pepstatin A, 40  $\mu$ M leupeptin, 10  $\mu$ M bestatin, 50  $\mu$ g/mL of chymostatin, 2  $\mu$ M calpain inhibitor, 10  $\mu$ g/mL of antipain, 200  $\mu$ g/mL of soybean trypsin inhibitor, 1 mM PMSF, and 0.5 mM sodium vanadate. After centrifugation, the clear lysate was removed and frozen in aliquots at -80 °C. For SDS/PAGE, 2.5–6  $\mu$ g of total protein was applied per lane, transferred to a PVDF membrane (Millipore), and blocked with PBS containing 5% dry milk and 0.1% Tween 20. The membrane was incubated with

anti-ITPK1 (1:5,000 dilution) in blocking buffer, followed by incubation with goat-anti-rabbit IgG (HRP) (Pierce). The blot was developed with Supersignal West Pico ECL reagent (Pierce) using standard x-ray film.

**Immunostaining, Xgal Staining, and In Situ Hybridization.** For immunostaining, the primary antibody was rabbit anti-ITPK1 (1:1,000 dilution), and the secondary antibody was goat anti-rabbit biotinylated IgG (NEF-813, 1:2,000 dilution; NEN Life Science). The avidin-biotin immunoperoxidase system (Vectastain Elite ABC Kit; Vector Laboratories) and diaminobenzidine (Sigma Aldrich) were used to visualize the bound antibody. Slides were then counterstained with 100% hematoxylin. For Xgal staining, frozen sections (10  $\mu$ m) were prepared by embedding late-gestation mouse embryos or isolated organs from postnatal animals in OCT (Tissue-Tek). Sections of E12.5 mouse embryos were then fixed with 0.2% glutaraldehyde in PBS for 10–20 min; permeabilized with 100 mM potassium phosphate (pH 7.4), 0.02% Nonidet P-40, and 0.01% sodium deoxycholate for 5–15 min; and then incubated in 0.5 mg/mL of Xgal (Promega) with 10 mM K<sub>3</sub>[Fe(CN)<sub>6</sub>], 10 mM K<sub>4</sub>[Fe(CN)<sub>6</sub>], 100 mM potassium phosphate (pH 7.4), 0.02% Nonidet P-40, and 0.01% sodium deoxycholate at 30 °C overnight. Xgal-stained sections were counterstained with eosin (52). Whole-mount embryos were postfixed with 1% glutaraldehyde in PBS, embedded in OCT, cryosectioned, and counterstained with eosin (52). For in situ hybridization, sections were incubated in a final volume of 80  $\mu$ L with 10<sup>6</sup> cpm of [<sup>33</sup>P]-labeled antisense riboprobe prepared using [<sup>33</sup>P]UTP (3,000 Ci/mmol; ICN Biomedicals), T7 polymerase, and 1,400-bp mouse *Itpk1* cDNA cloned in pGEM and linearized with HindIII.

**Skeleton Staining.** Embryos were harvested at various times, eviscerated, and fixed overnight in 100% ethanol. They were then transferred to acetone for an additional 24 h, skinned, and refixed briefly. After a water rinse, the embryos were stained in 0.2% alizarin red S in 95% ethanol: 0.3% alcian blue 8GX in 70% ethanol: 70% acetic acid: 100% ethanol (1:1:1:17) for 4–6 h at 37 °C, and then at room temperature for 24 h. The embryos were then treated with 1% trypsin in 30% saturated sodium borate solution at 37 °C until the ribs became clear. After removal of any remaining internal organs, skeletons were treated with 1% KOH, rinsed in water, and stored in 20% glycerol.

**Scanning Electron Microscopy.** Embryos were fixed in 2% glutaraldehyde and 4% paraformaldehyde in 0.1 M sodium phosphate buffer (pH 7.2) and postfixed in 2% OsO<sub>4</sub> in 0.1 M sodium phosphate buffer (pH 7.2). The specimens were then dehydrated with ethanol, transferred to isoamyl acetate, and dried in a critical-point drier using CO<sub>2</sub> as the transitional fluid. The dried specimens were coated with gold and examined with an Akashi ALPHA-30 scanning electron microscope at 30 kV (55).







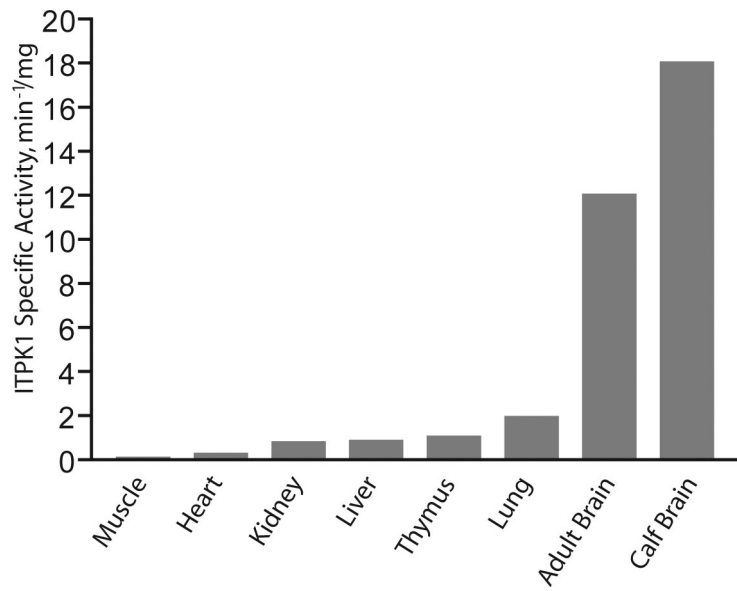

**Fig. S4.** Enzymatic activity of ITPK1 in bovine tissues. Soluble extracts of bovine tissues were prepared and assayed for phosphorylation of I(1,3,4)P<sub>3</sub> as described previously (14). ITPK1 activity is expressed as a first-order rate constant,  $k_1$ , where  $[S] = [S]_0 e^{-k_1 t}$ .
